# Supplementary material for: Influenza activity in the Eastern Mediterranean Region (EMR) in 2020–2021 amidst the COVID-19 pandemic
Source: PubMed Central journal article supplement — BMJ Glob Health. 2022 Jun 28;7(Suppl 4):e008506. doi: 10.1136/bmjgh-2022-008506 (PMC9240446; doi:10.1136/bmjgh-2022-008506), 2022-06-28
Supplement: bmjgh-2022-008506supp001.pdf [file bmjgh-2022-008506supp001.pdf]

Supplementary materials:

Map 1: Map of EMR countries (n=22)

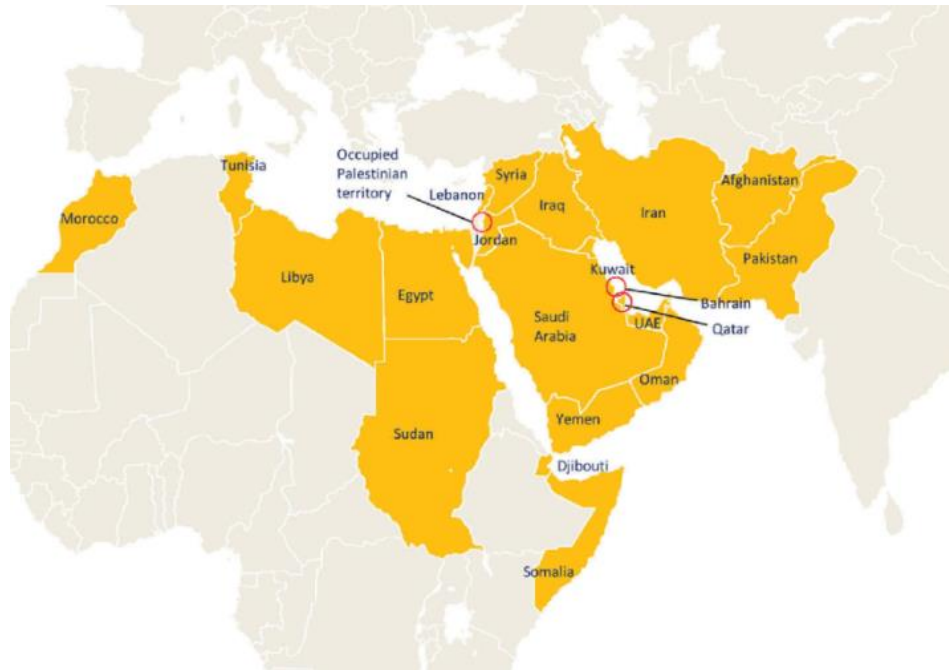

**North/East Africa:** Djibouti, Egypt, Libya, Morocco, Somalia, Sudan, Tunisia

**West Asia:** Bahrain, Iraq, Jordan, Kuwait, Lebanon, Oman, Occupied Palestinian Territory, Qatar, Saudi Arabia, Syrian Arab Republic, United Arab Emirates, Yemen

**South Asia:** Afghanistan, Islamic Republic of Iran, Pakistan
