# Supplementary material for: Influenza activity in the Eastern Mediterranean Region (EMR) in 2020–2021 amidst the COVID-19 pandemic
Source: PubMed Central journal article supplement — BMJ Glob Health. 2022 Jun 28;7(Suppl 4):e008506. doi: 10.1136/bmjgh-2022-008506 (PMC9240446; doi:10.1136/bmjgh-2022-008506), 2022-06-28

Figure 6: Percentage of positive influenza specimens by age group, by analytical period, EM region, from 2016-2017 till 2021-2022 season (up to week 33)

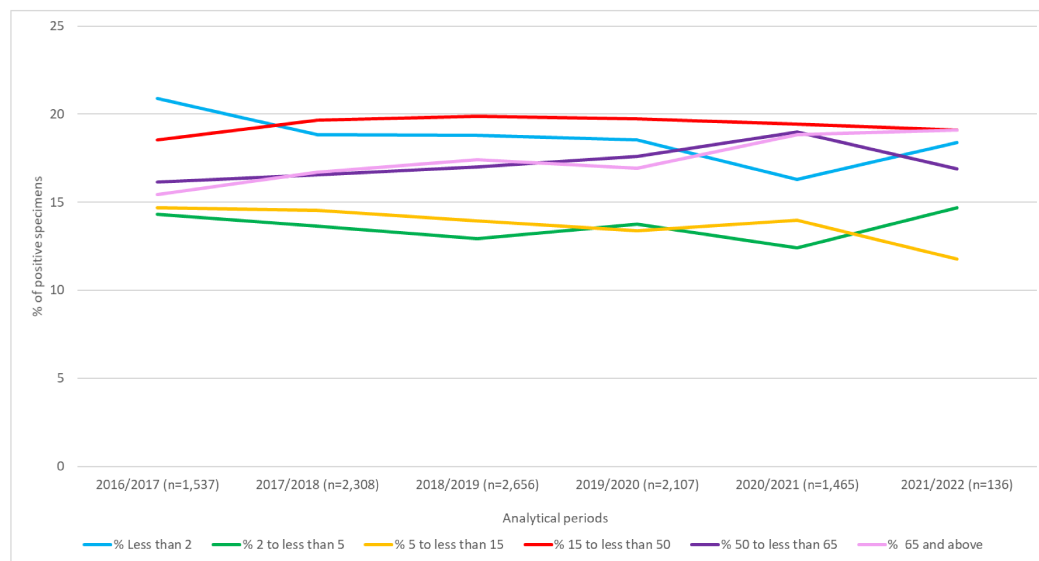

Supplement: bmjgh-2022-008506supp002.pdf [file bmjgh-2022-008506supp002.pdf]
